# Supplementary material
Source: publisher figshare collection journal article supplement (https://tandf.figshare.com/ndownloader/files/30774006)
Supplement: Supplementary file 1 [file 30774006]

Supplementary table 1 List of primers.

| Primers | Recognition sites | Primer sequences (5’-3’) | Product length (bp) |
| --- | --- | --- | --- |
| P1F | 9970-9992 | TCTTTAAAAACTTCAAAGAAAAA | 5799 |
| P1R | 96-120 | ACATAATTTATCCTATCAGAATAA |
| P2F | 2-26 | TAAAAATAAGCTAAATTTAAGCTT | 2254 |
| P2R | 2230-2255 | TATACTTCTGGATGGCCAAAAAATCA |
| P3F | 1523-1547 | ACTCAACAAATCATAAAGATATTGG | 7280 |
| P3R | 8779-8802 | TGCGTATTCTTCTGTTGCTCATAT |
| P4F | 6253-6276 | TAAGCTGCTAACTTAATTTTTAGT | 4697 |
| P4R | 10925-10949 | TCATAATAAATTCCTCGACCAATAT |
